# Supplementary material for: Resveratrol Improved Flow-Mediated Outward Arterial Remodeling in Ovariectomized Rats with Hypertrophic Effect at High Dose
Source: PubMed Central journal article supplement (PMC4703409; doi:10.1371/journal.pone.0146148), 2016-01-06
Supplement: pone.0146148.s001.pdf [file pone.0146148.s001.pdf]

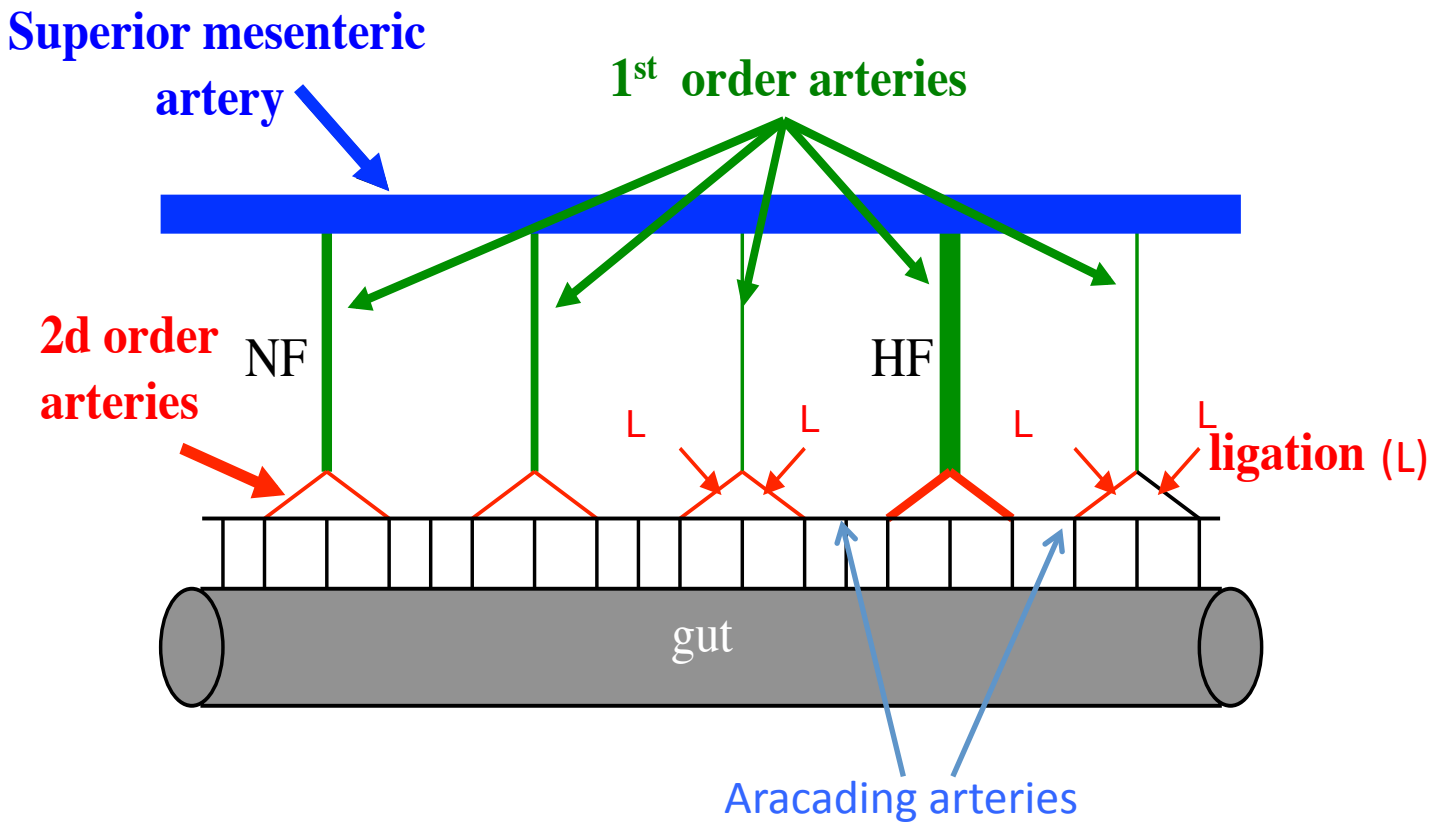

**S1 Fig. Chronic increase in blood flow in vivo:** scheme depicting the surgical procedure applied to the mesenteric arteries in order to increase locally blood flow in one artery (high flow: HF) after ligation of second order mesenteric arteries as shown by the red arrows (L). Arteries located at distance were used as control arteries (normal flow: NF).
