# Supplementary material for: Resveratrol Improved Flow-Mediated Outward Arterial Remodeling in Ovariectomized Rats with Hypertrophic Effect at High Dose
Source: PubMed Central journal article supplement (PMC4703409; doi:10.1371/journal.pone.0146148), 2016-01-06
Supplement: pone.0146148.s003.pdf [file pone.0146148.s003.pdf]

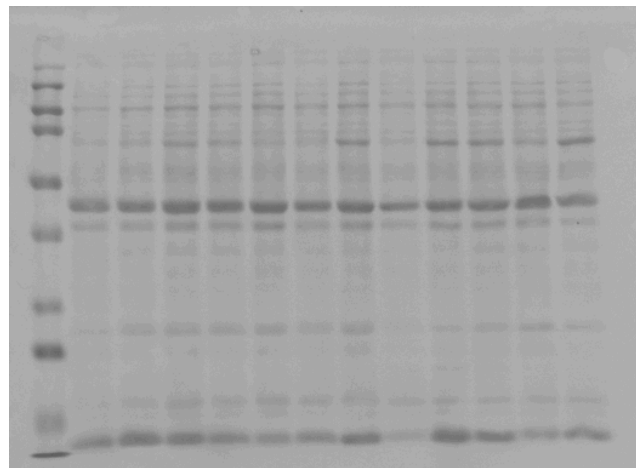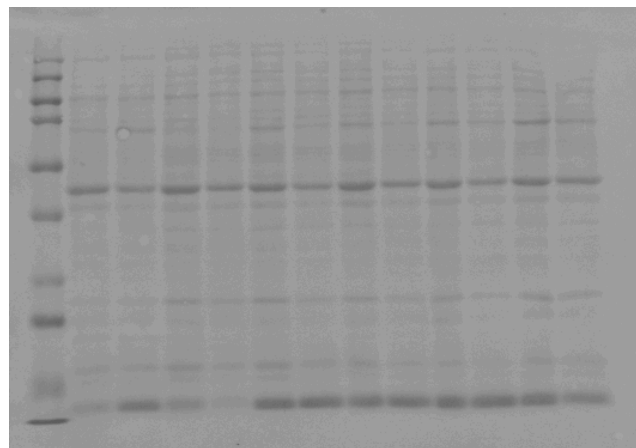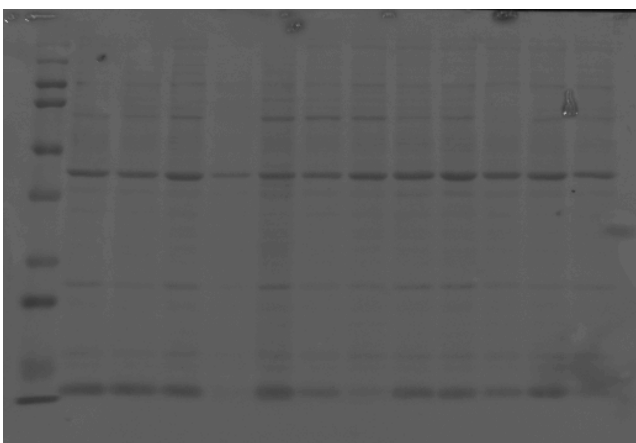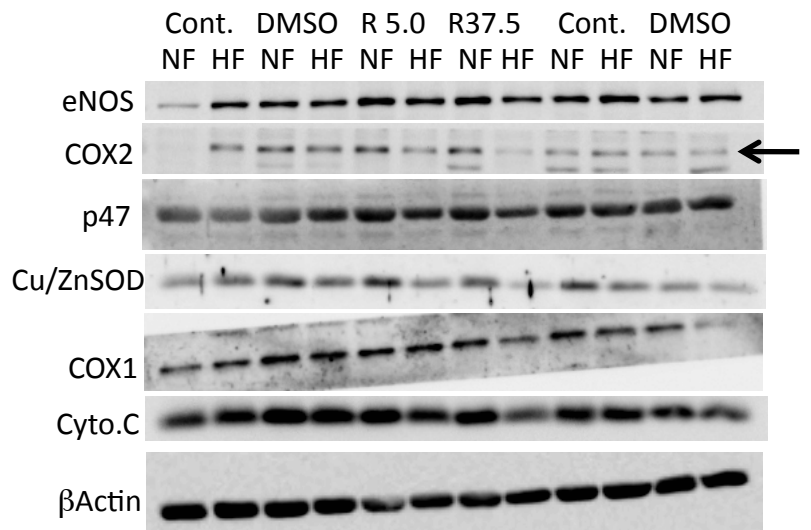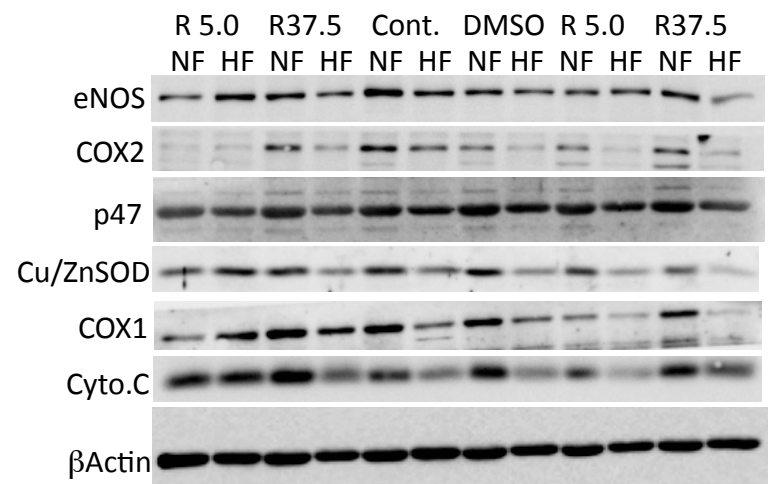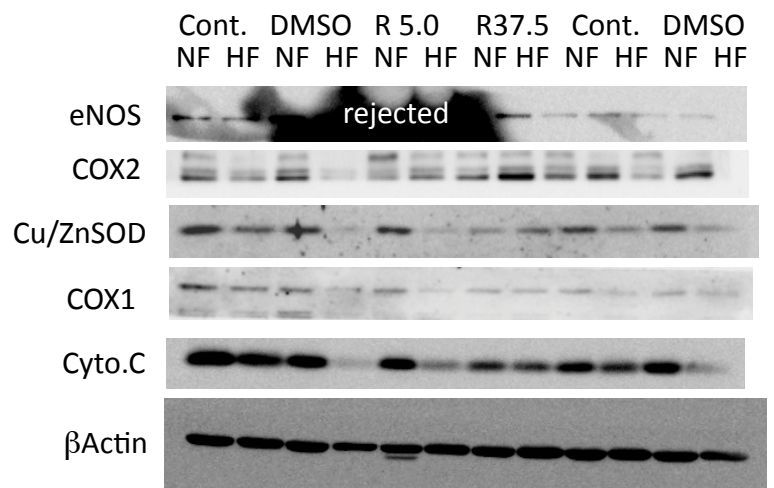

**S3 Fig. Western Blots analysis, part 1:** Western blot analysis of mesenteric arteries submitted to normal flow (NF) or to high flow (HF) isolated of rats treated with resveratrol 5 (R5.0) or 37.5mg/kg per day (R37.5) or with the solvent (DMSO) or nothing (Cont.). The following proteins were analyzed: endothelial NO syntase (eNOS), cyclooxygenase-2 (COX2), p47phox, Cu/ZnSOD, cyclooxygenase-1 (COX1), Cytochrome C Oxidase IV (Cyto C) and beta actin (βactin)

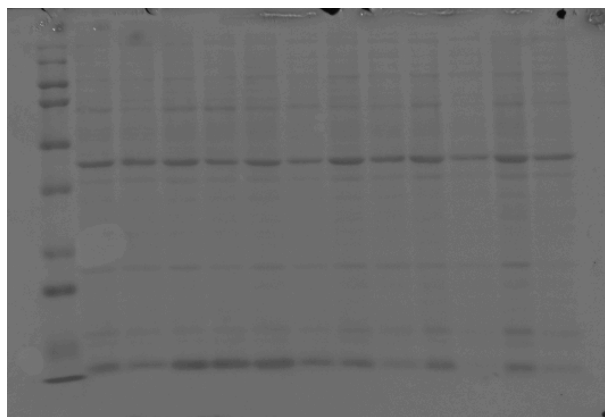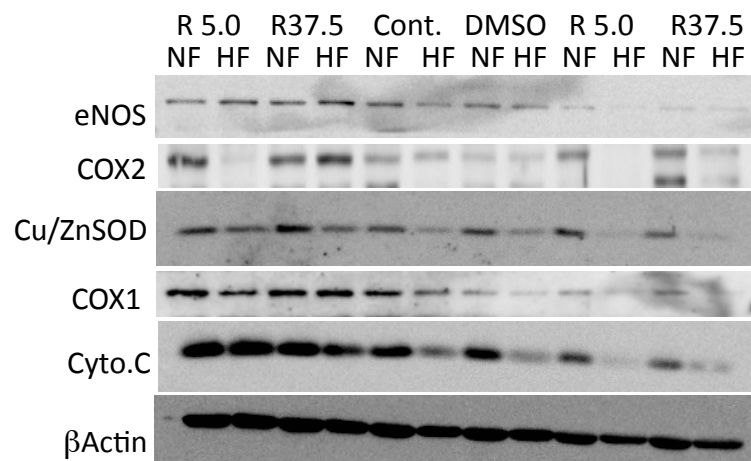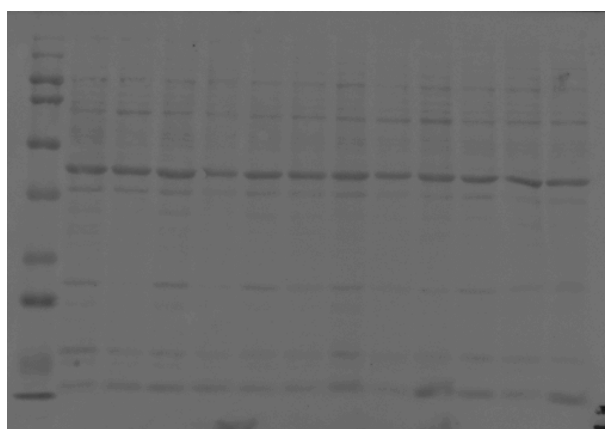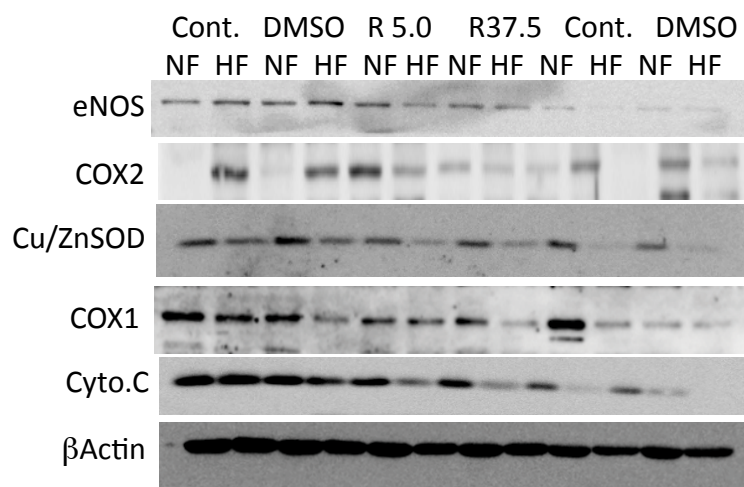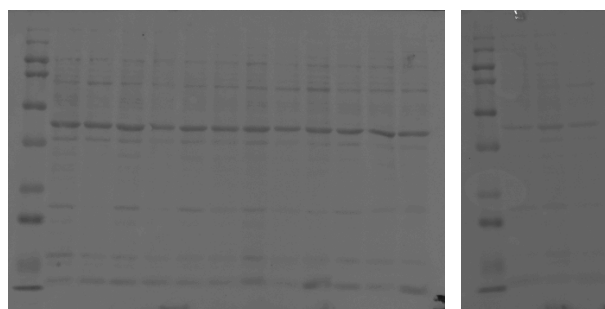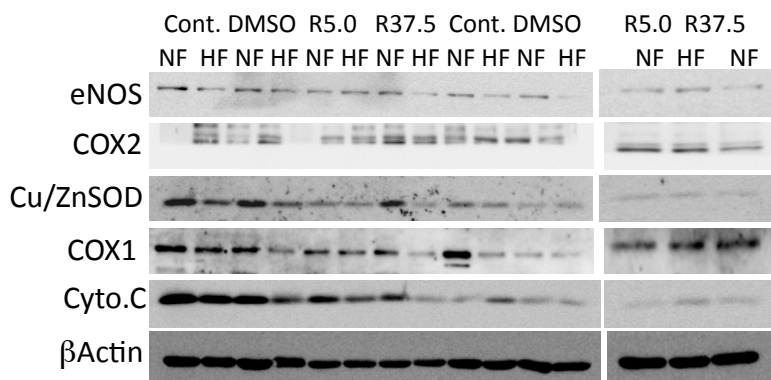

**S3 Fig. Western Blots analysis, part 2:** Western blot analysis of mesenteric arteries submitted to normal flow (NF) or to high flow (HF) isolated of rats treated with resveratrol 5 (R5.0) or 37.5mg/kg per day (R37.5) or with the solvent (DMSO) or nothing (Cont.). The following proteins were analyzed: endothelial NO syntase (eNOS), cyclooxygenase-2 (COX2), p47phox, Cu/ZnSOD, cyclooxygenase-1 (COX1), Cytochrome C Oxidase IV (Cyto C) and beta actin (βactin)

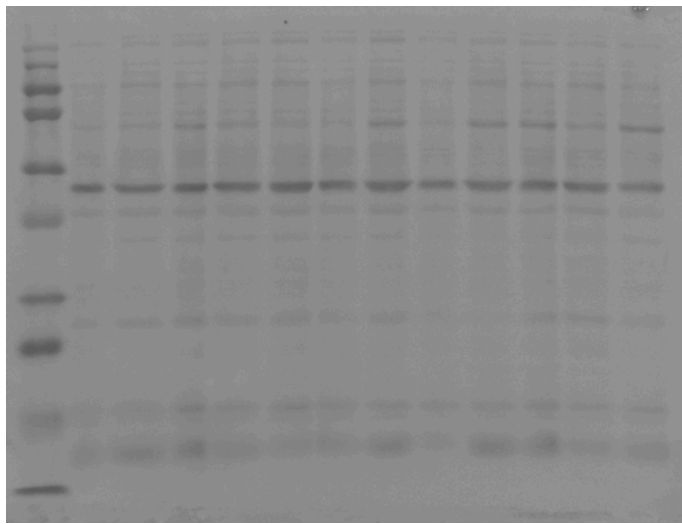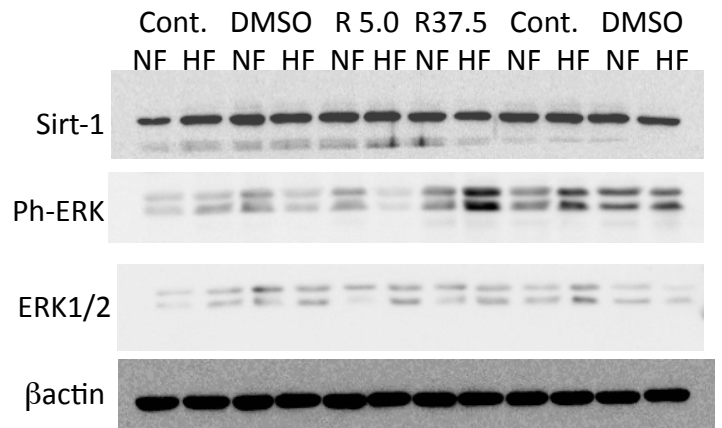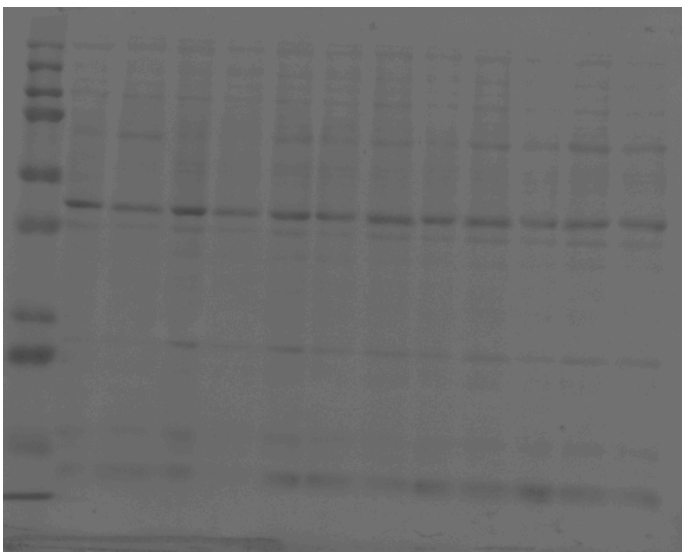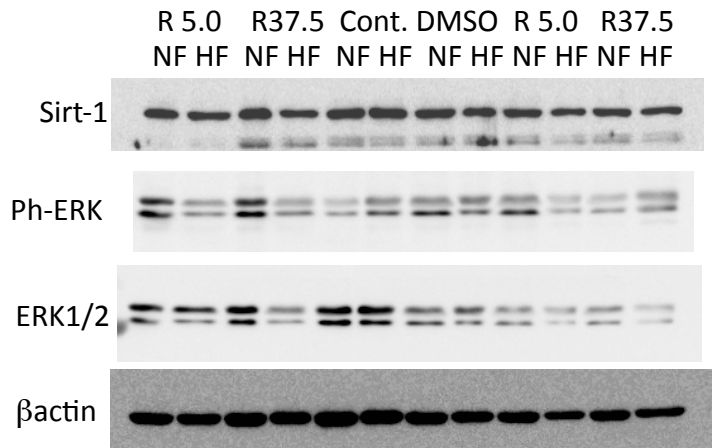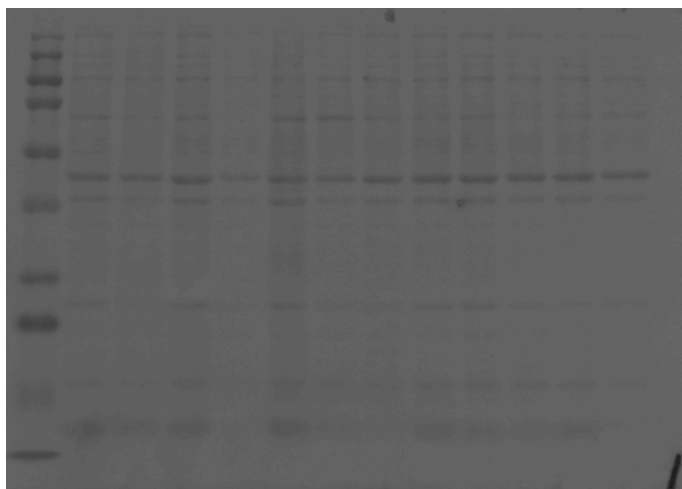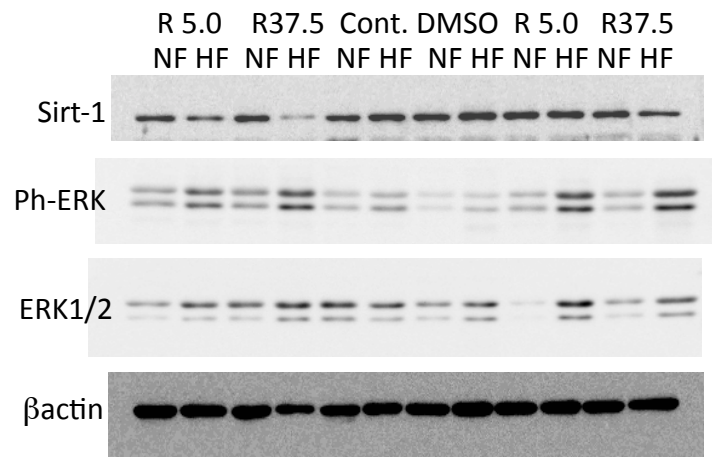

**S3 Fig. Western Blots analysis, part 3:** Western blot analysis of mesenteric arteries submitted to normal flow (NF) or to high flow (HF) isolated of rats treated with resveratrol 5 (R5.0) or 37.5mg/kg per day (R37.5) or with the solvent (DMSO) or nothing (Cont.). The following proteins were analyzed: Sirtuin-1 (Sirt-1), phospho-ERK1/2 (ph-ERK), ERK1/2 and beta actin ( $\beta$ actin)

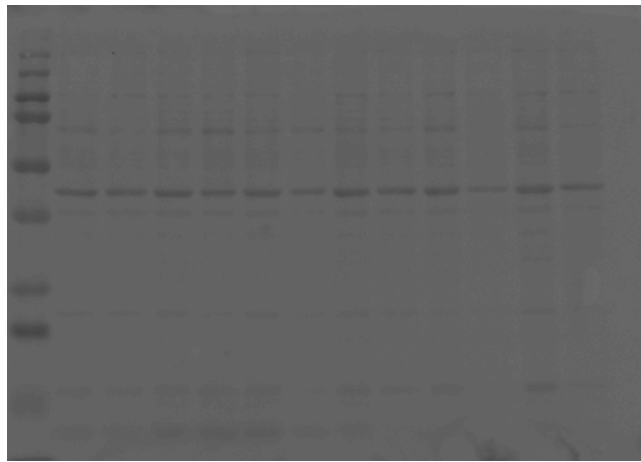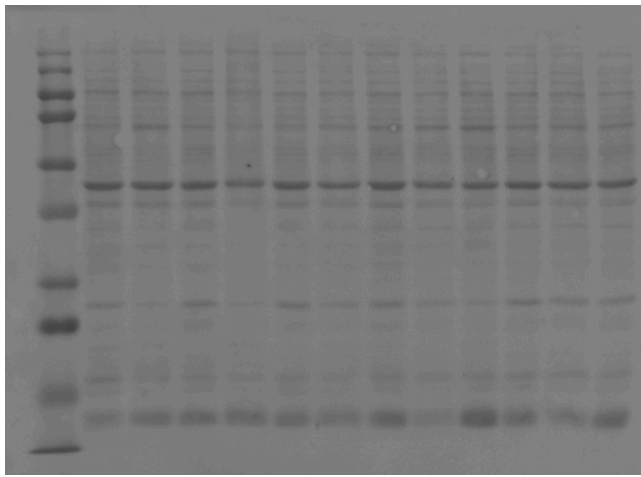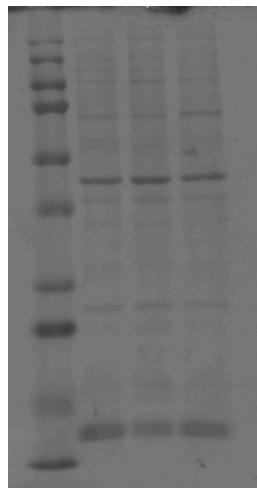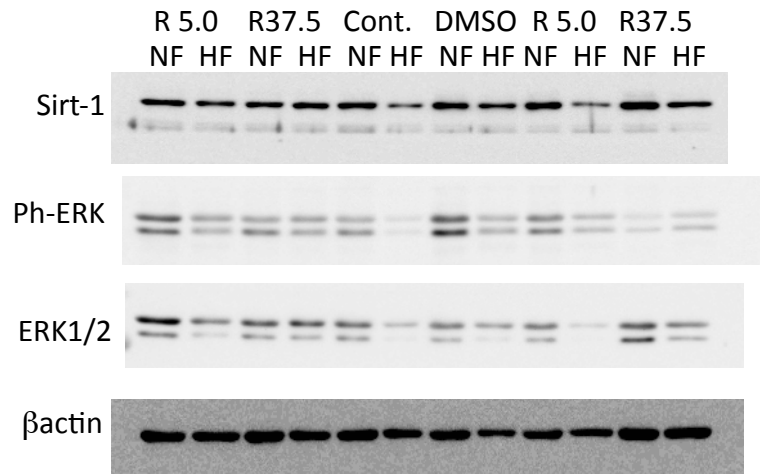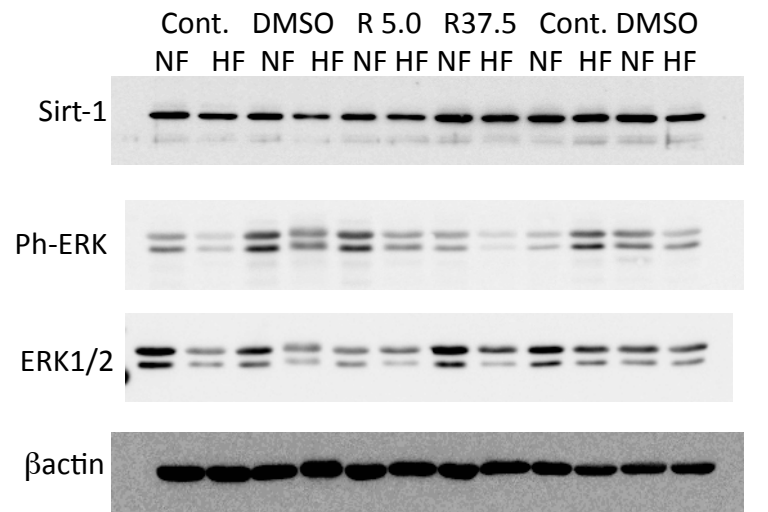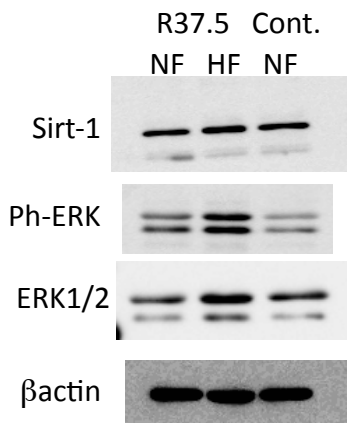

**S3 Fig. Western Blots analysis, part 4:** Western blot analysis of mesenteric arteries submitted to normal flow (NF) or to high flow (HF) isolated of rats treated with resveratrol 5 (R5.0) or 37.5mg/kg per day (R37.5) or with the solvent (DMSO) or nothing (Cont.). The following proteins were analyzed: Sirtuin-1 (Sirt-1), phospho-ERK1/2 (ph-ERK), ERK1/2 and beta actin (βactin)
